# Supplementary material for: Structure of Machupo virus polymerase in complex with matrix protein Z
Source: PubMed Central journal article supplement (PMC8546121; doi:10.1038/s41467-021-26432-3), 2021-10-25
Supplement: 41467_2021_26432_MOESM1_ESM.pdf [file 41467_2021_26432_MOESM1_ESM.pdf]

## Supplementary information

### Structure of Machupo virus polymerase in complex with matrix protein Z

Jun Ma<sup>1,4</sup>, Shuangyue Zhang<sup>1,2,4</sup>, Xinzheng Zhang<sup>1,2,3</sup>

<sup>1</sup> National Laboratory of Biomacromolecules, CAS Center for Excellence in Biomacromolecules, Institute of Biophysics, Chinese Academy of Sciences, Beijing, 100101, China

<sup>2</sup> University of Chinese Academy of Sciences, Beijing, 100049, China

<sup>3</sup> Center for Biological Imaging, CAS Center for Excellence in Biomacromolecules, Institute of Biophysics, Chinese Academy of Sciences, Beijing, 100101, China

<sup>4</sup> These authors contributed equally: Jun Ma, Shuangyue Zhang

Correspondence: Xinzheng Zhang ([xzzhang@ibp.ac.cn](mailto:xzzhang@ibp.ac.cn))

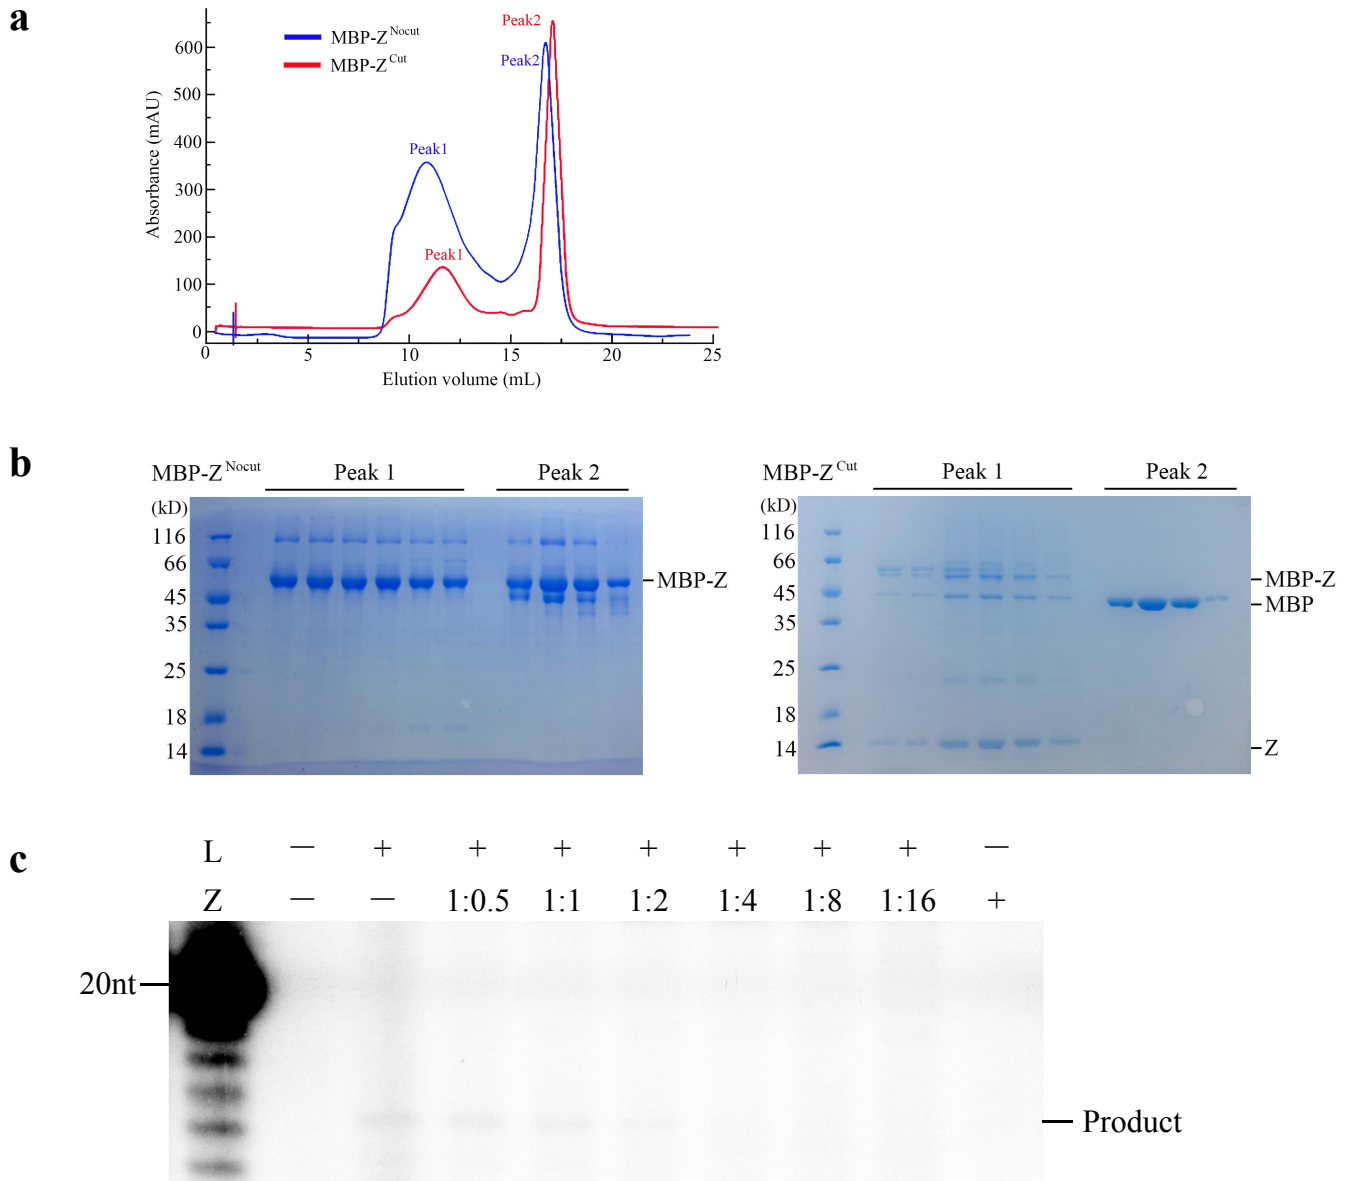

**Supplementary Figure 1. Biochemical Characterization of MACV Z protein.** **a** Gel filtration analysis of MBP-Z fusion protein with Superdex 200 Increase 10/300 GL. Blue, MBP-Z fusion protein after Ni column; Red, monomeric MBP-Z fusion protein digested by PPase. **b** The peaks of gel filtration profile are confirmed by subsequent coomassie-stained SDS-PAGE. Molecular weights (in kilodaltons) of marker are shown on the left, and bands are labeled on the right. **c** In vitro polymerase activity assay for MACV L protein inhibited by MBP-Z fusion protein. The different mole ratio between the L and Z proteins is indicated. The inhibitory effect increases with an increasing amount of MBP-Z fusion protein. The data shown above are representative results of more than two independent experiments.

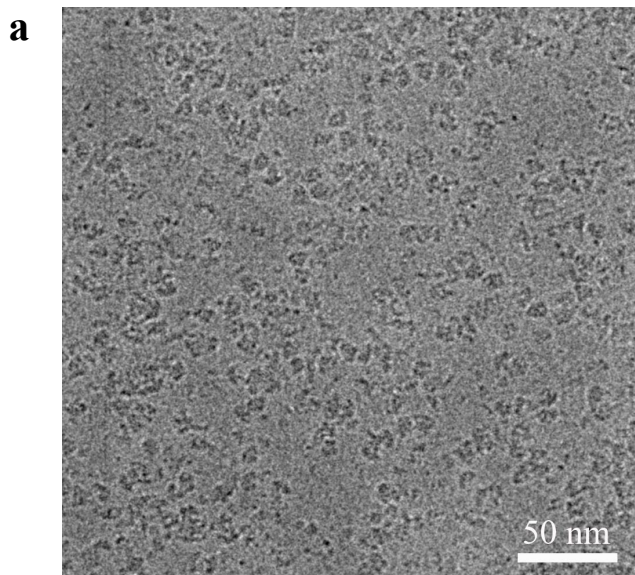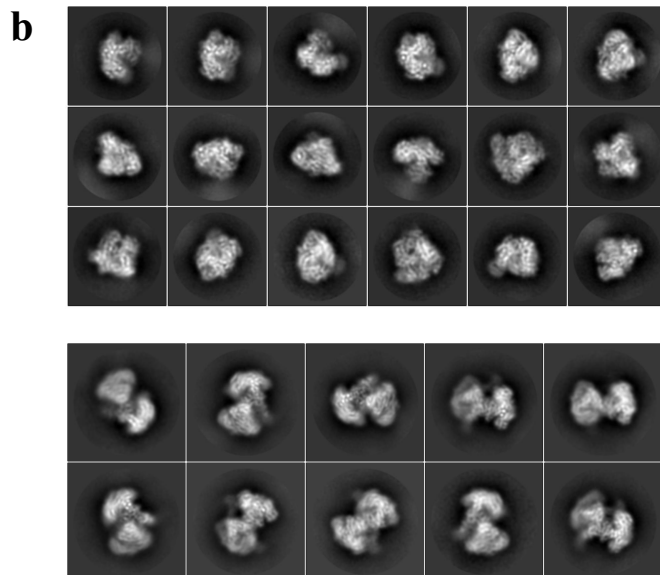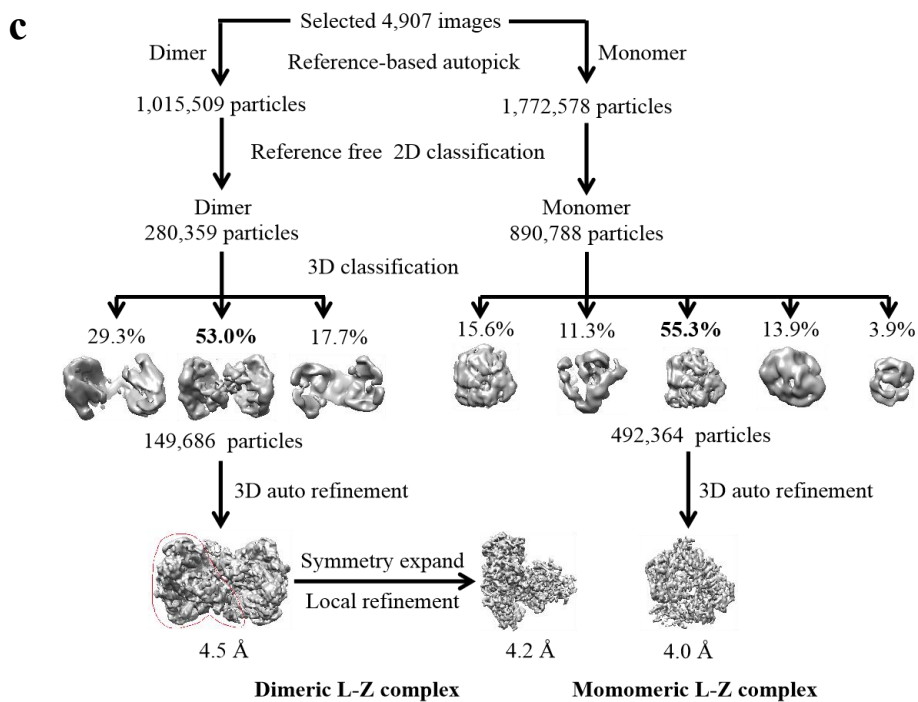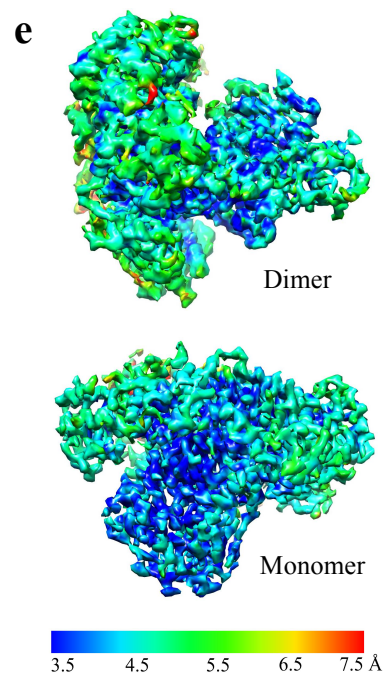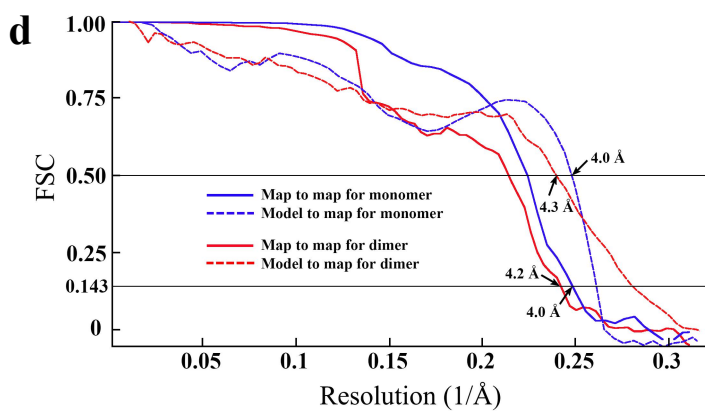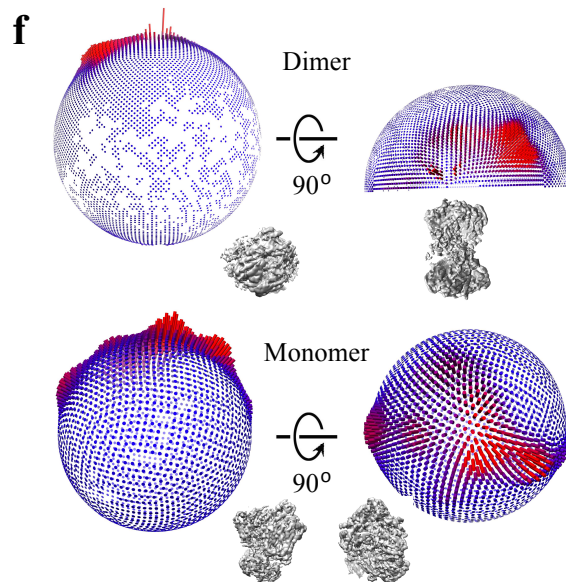

**Supplementary Figure 2. Single-particle cryo-EM analysis of MACV L-Z complex.** **a** Representative cryo-EM image of MACV L-Z complex (one out of 4,907 micrographs). **b** Representative reference-free 2D-class averages of monomeric (upper) and dimeric complex (lower). **c** Data-processing workflow for MACV L-Z complex. **d** The gold standard Fourier shell correlation (FSC) curves for the reconstruction. FSC curves between two half maps (monomer: blue line, dimer: red line) are indicated with resolutions at FSC = 0.143. FSC curves between model and map (monomer: blue dashed line, dimer: red dashed line) are indicated with resolutions at FSC = 0.5. **e** Local resolution maps for dimeric (upper) and monomeric (lower) complex estimated by RasMap. **f** Angular distribution of dimeric (upper) and monomeric (lower) particle.



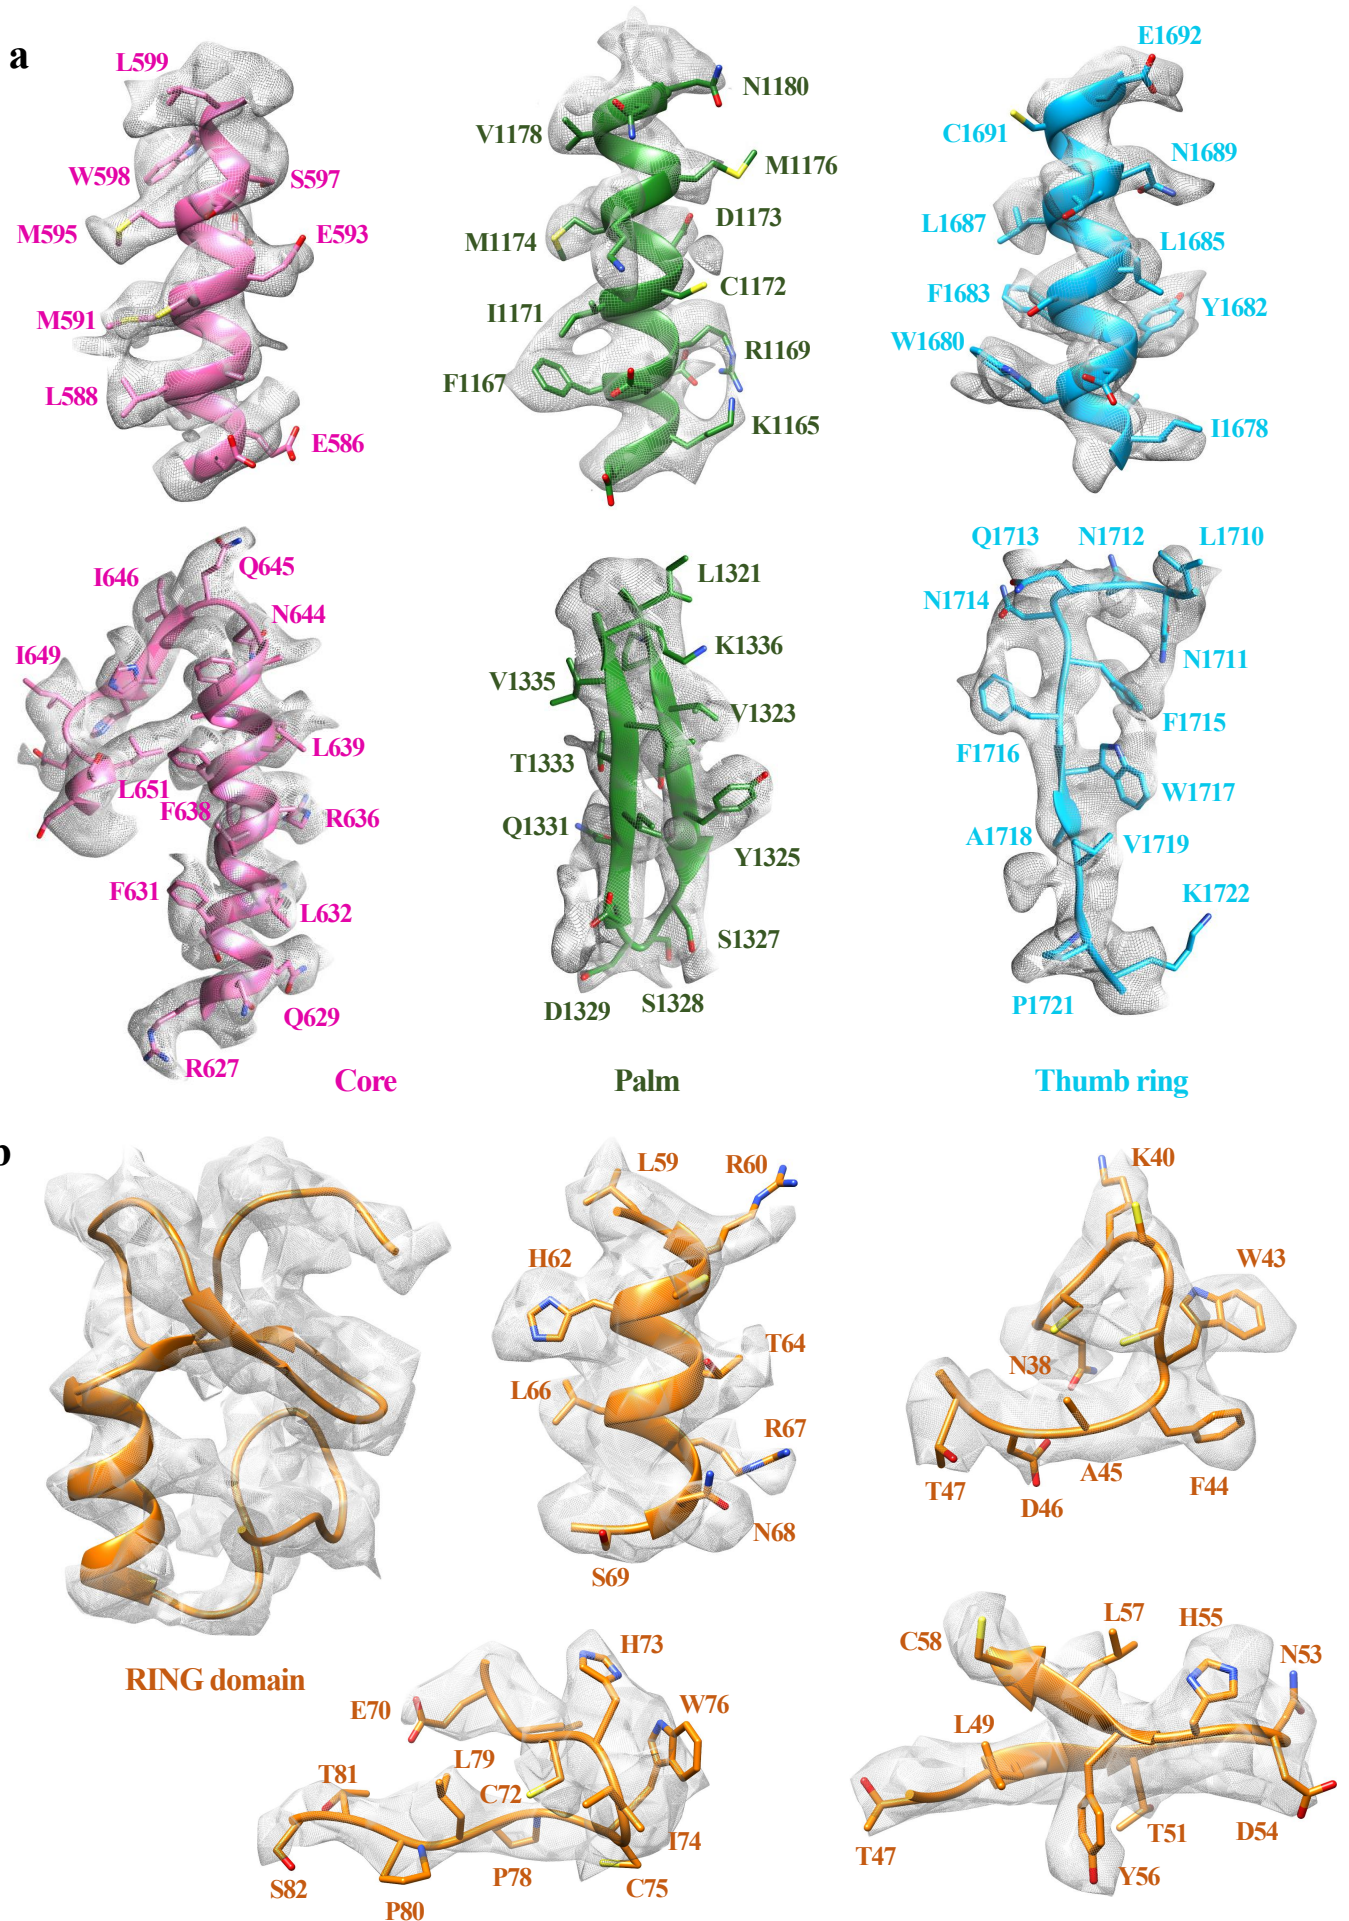

**Supplementary Figure 3. Representative densities and atomic models of monomeric MACV L-Z complex. a** Representative densities and atomic models of selected secondary structures of L. **b** Representative densities and atomic models of selected secondary structures of Z. The densities are shown as gray meshes. The corresponding models are shown as ribbon colored as Figure 1a, and selected side chain are shown as sticks and labeled.

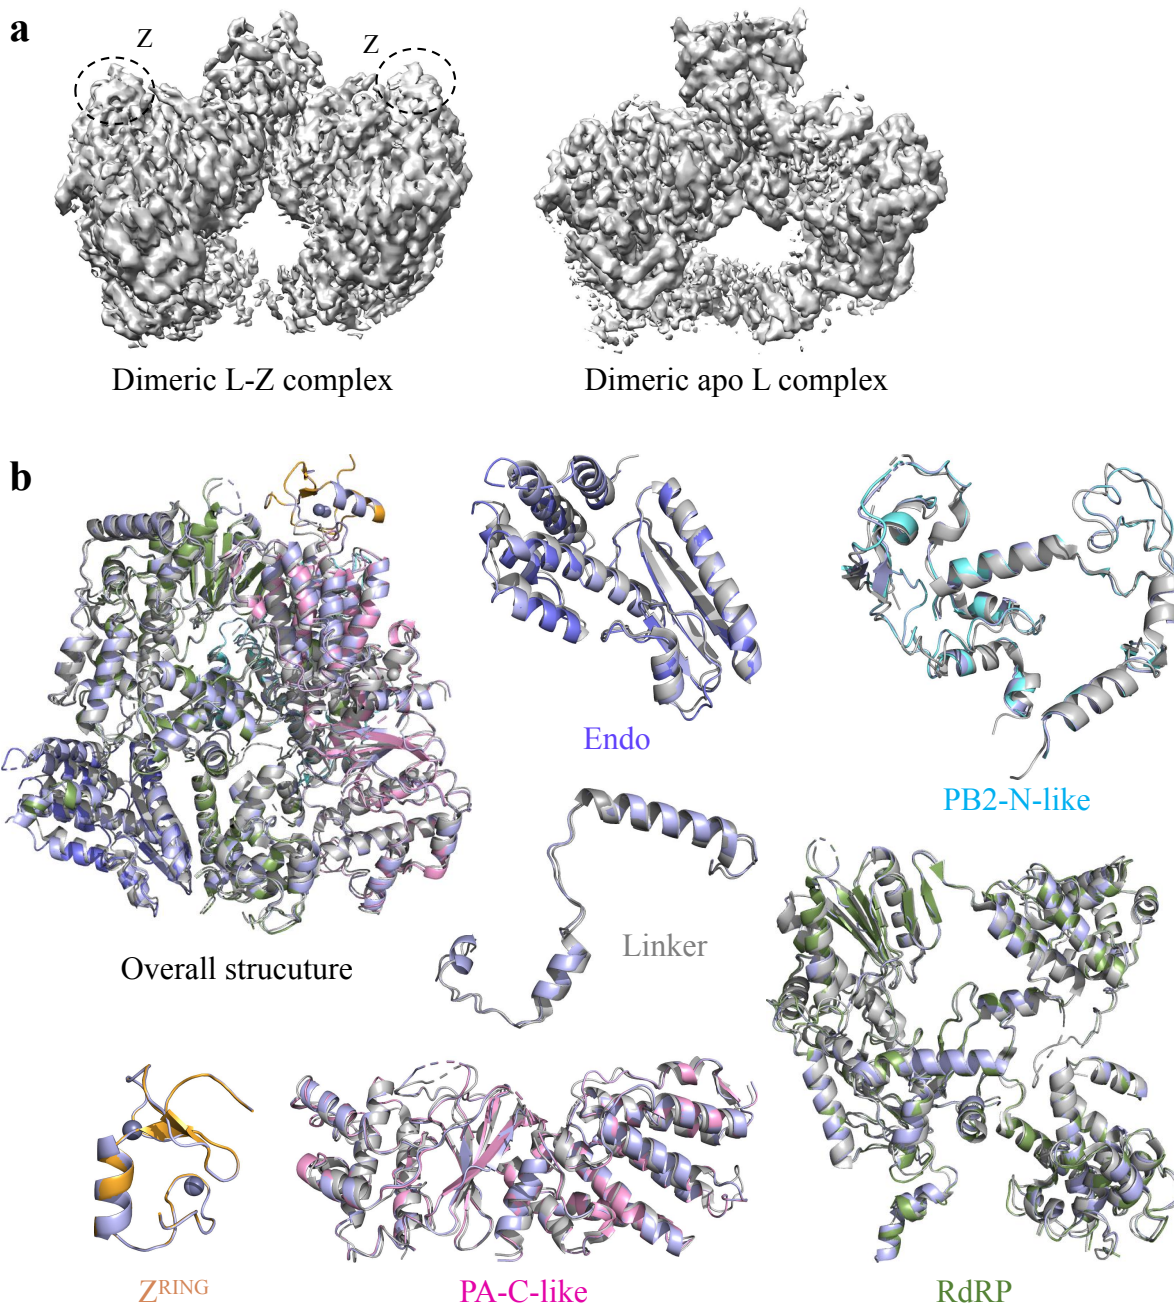

**Supplementary Figure 4. Structural comparison of MACV L protein in different states.** **a** Comparison of density maps between dimeric L-Z complex and apo L. The densities of the Z protein in the dimeric L-Z complex are indicated by black dashed circles. **b** Superposition of monomeric L-Z complex with monomer in dimeric L-Z complex and apo L protein. The overall structure and domains are superposed, respectively. Domains of monomeric L-Z complex are colored as in Figure 1a, while monomer in dimeric L-Z complex is colored blue white and apo L protein colored gray.



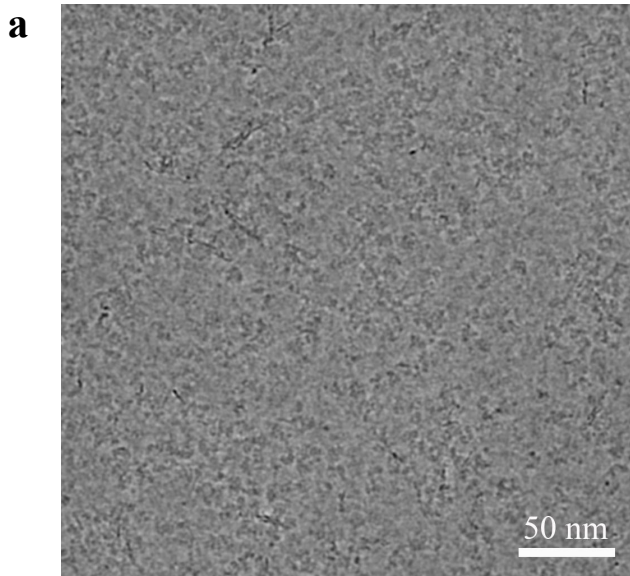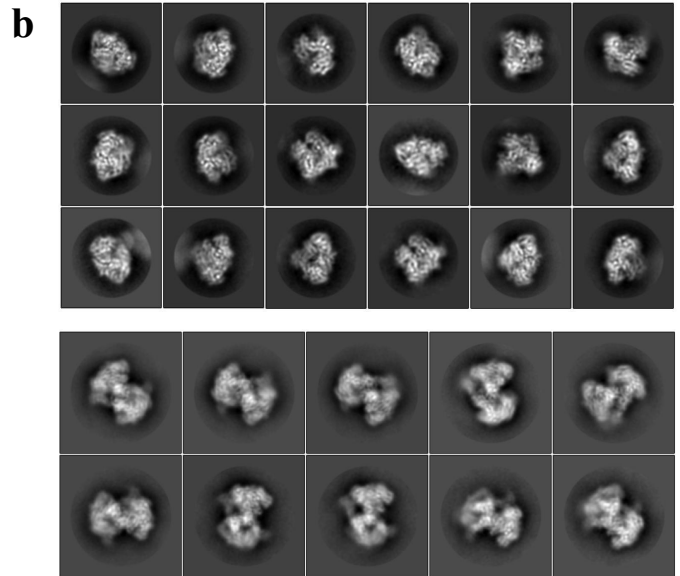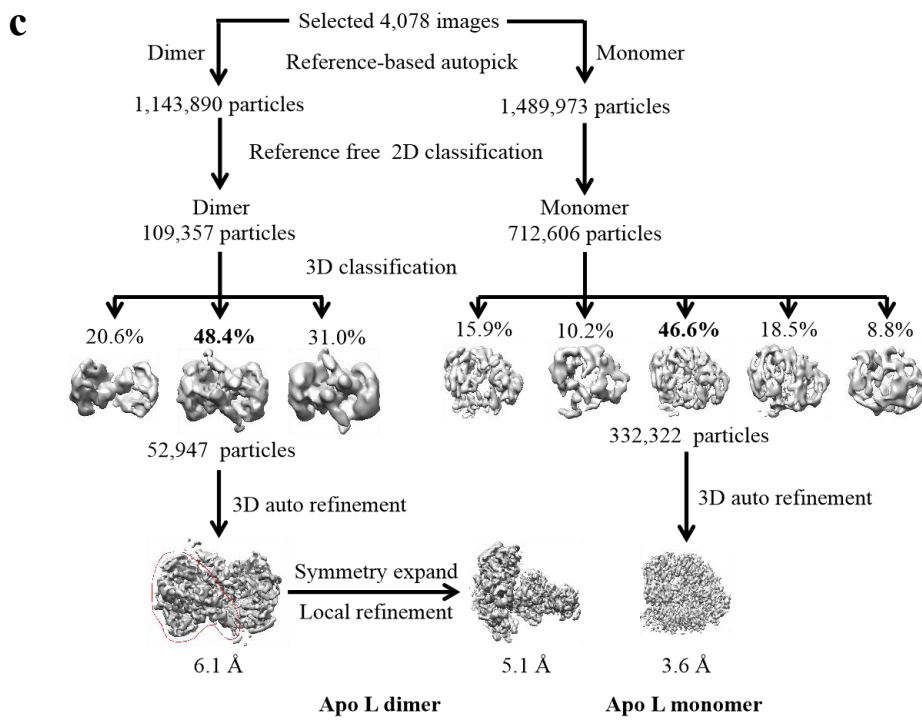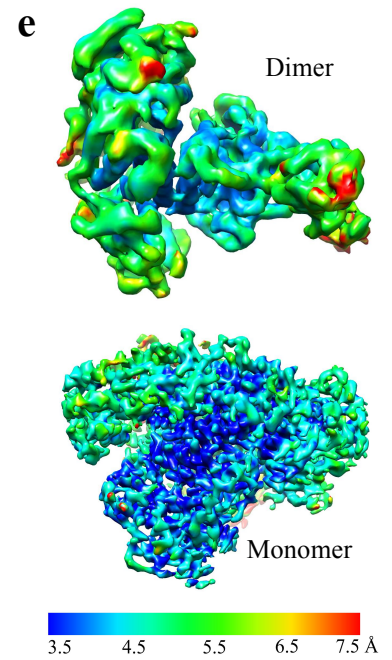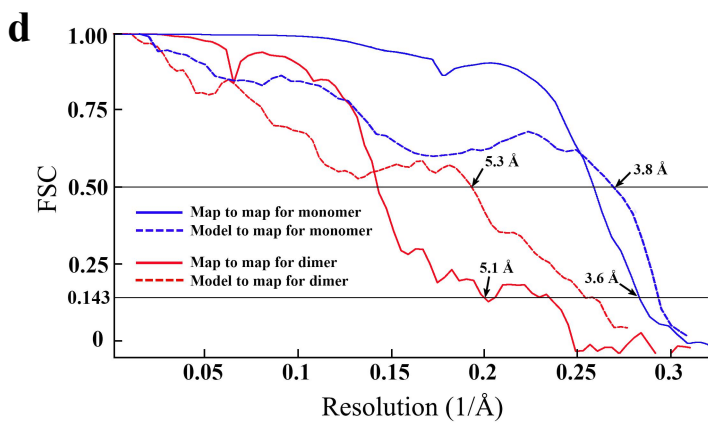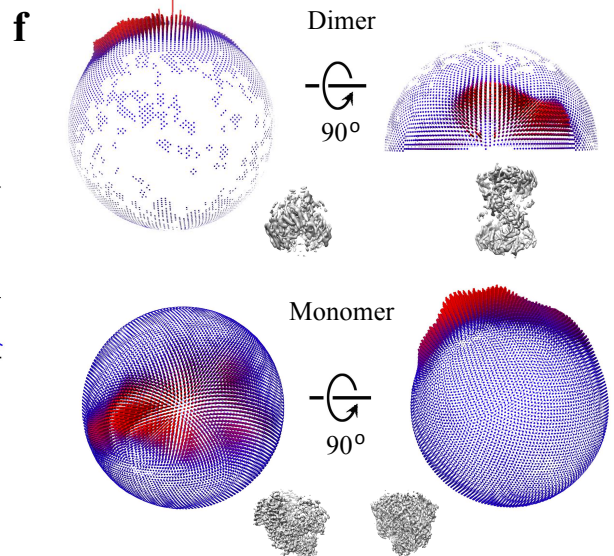

**Supplementary Figure 5. Single-particle cryo-EM analysis of apo MACV L protein.** **a** Representative cryo-EM image of apo MACV L protein (one out of 4,078 micrographs). **b** Representative reference-free 2D-class averages of monomer (upper) and dimer (lower). **c** Data-processing workflow for apo MACV L protein. **d** The gold standard Fourier shell correlation (FSC) curves for the reconstruction. Curves are colored and resolutions indicated as Supplementary Figure 2d. **e** Local resolution maps for dimer (upper) and monomer (lower). **f** Angular distribution of dimeric (upper) and monomeric (lower) particles included in the final 3D reconstructions, with the cryo-EM maps shown in gray.

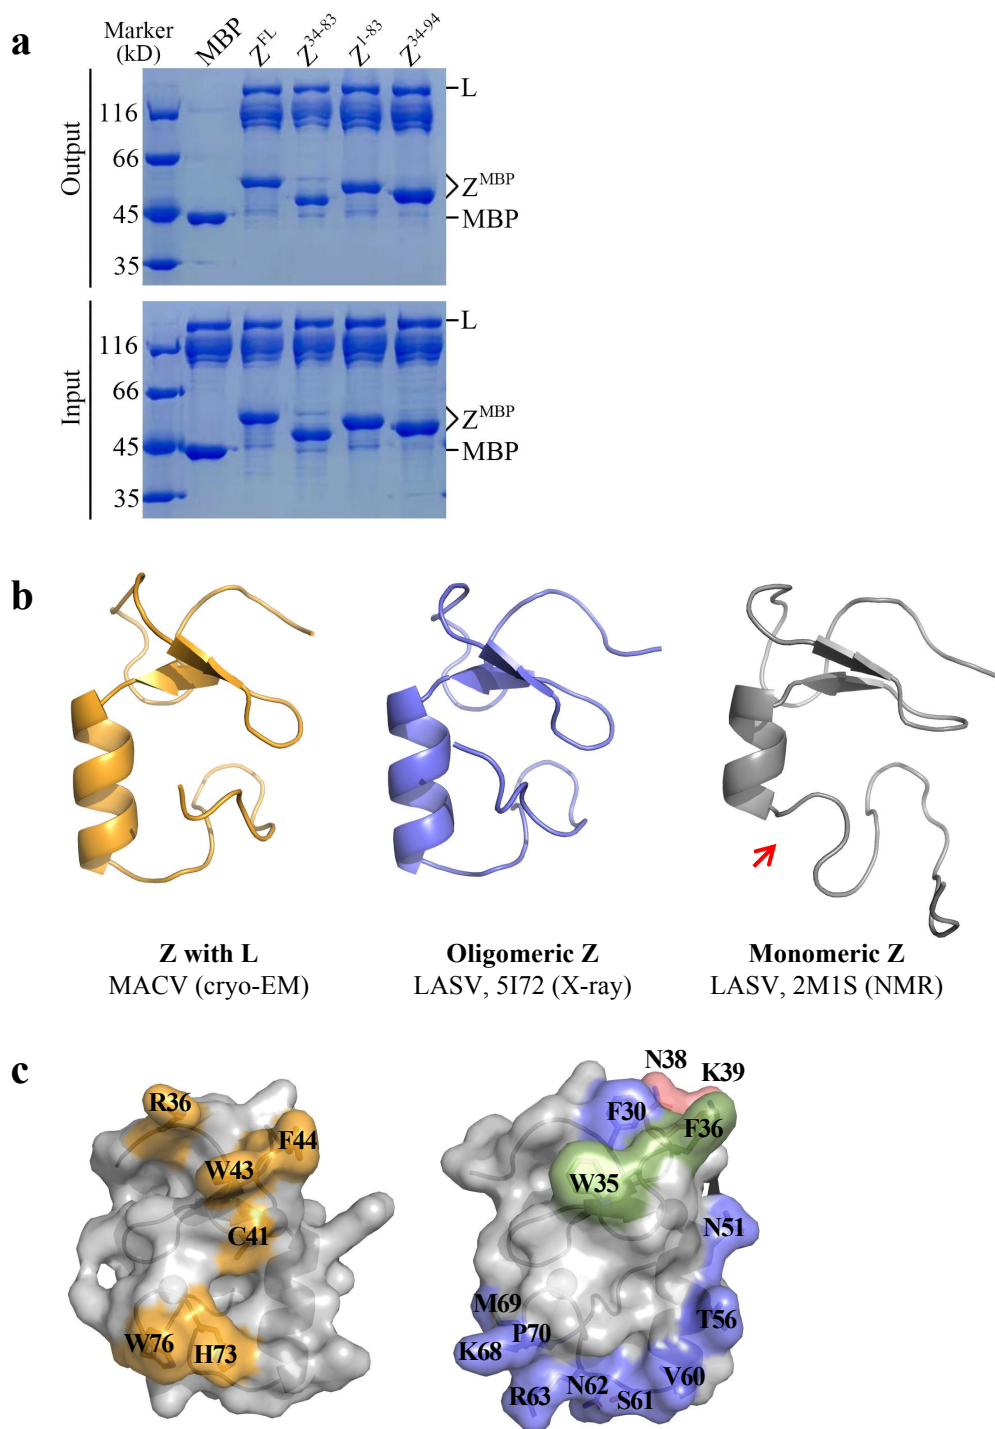

**Supplementary Figure 6. Structural comparison of MACV and LASV Z proteins.** **a** In vitro pull-down assay of different truncated Z proteins with MACV L protein. Experiments were repeated independently for more than two times. **b** Structural comparison of MACV Z protein in L-Z complex, LASV Z protein in oligomer (PDB 5I72, by crystallography) and monomer form (PDB code 2M1S, by NMR), colored orange, slate and gray, respectively. The short  $\alpha$ -helix is indicated by a red arrow. **c** Comparison of residues of MACV and LASV Z proteins involved in the interactions. Left, MACV Z protein is represented as gray transparent surface, with residues in interaction with L protein colored orange. Right, residues of LASV Z protein involved in polymerization is colored blue and smudge, with residues involved in interaction with eIF4e colored pink and smudge.



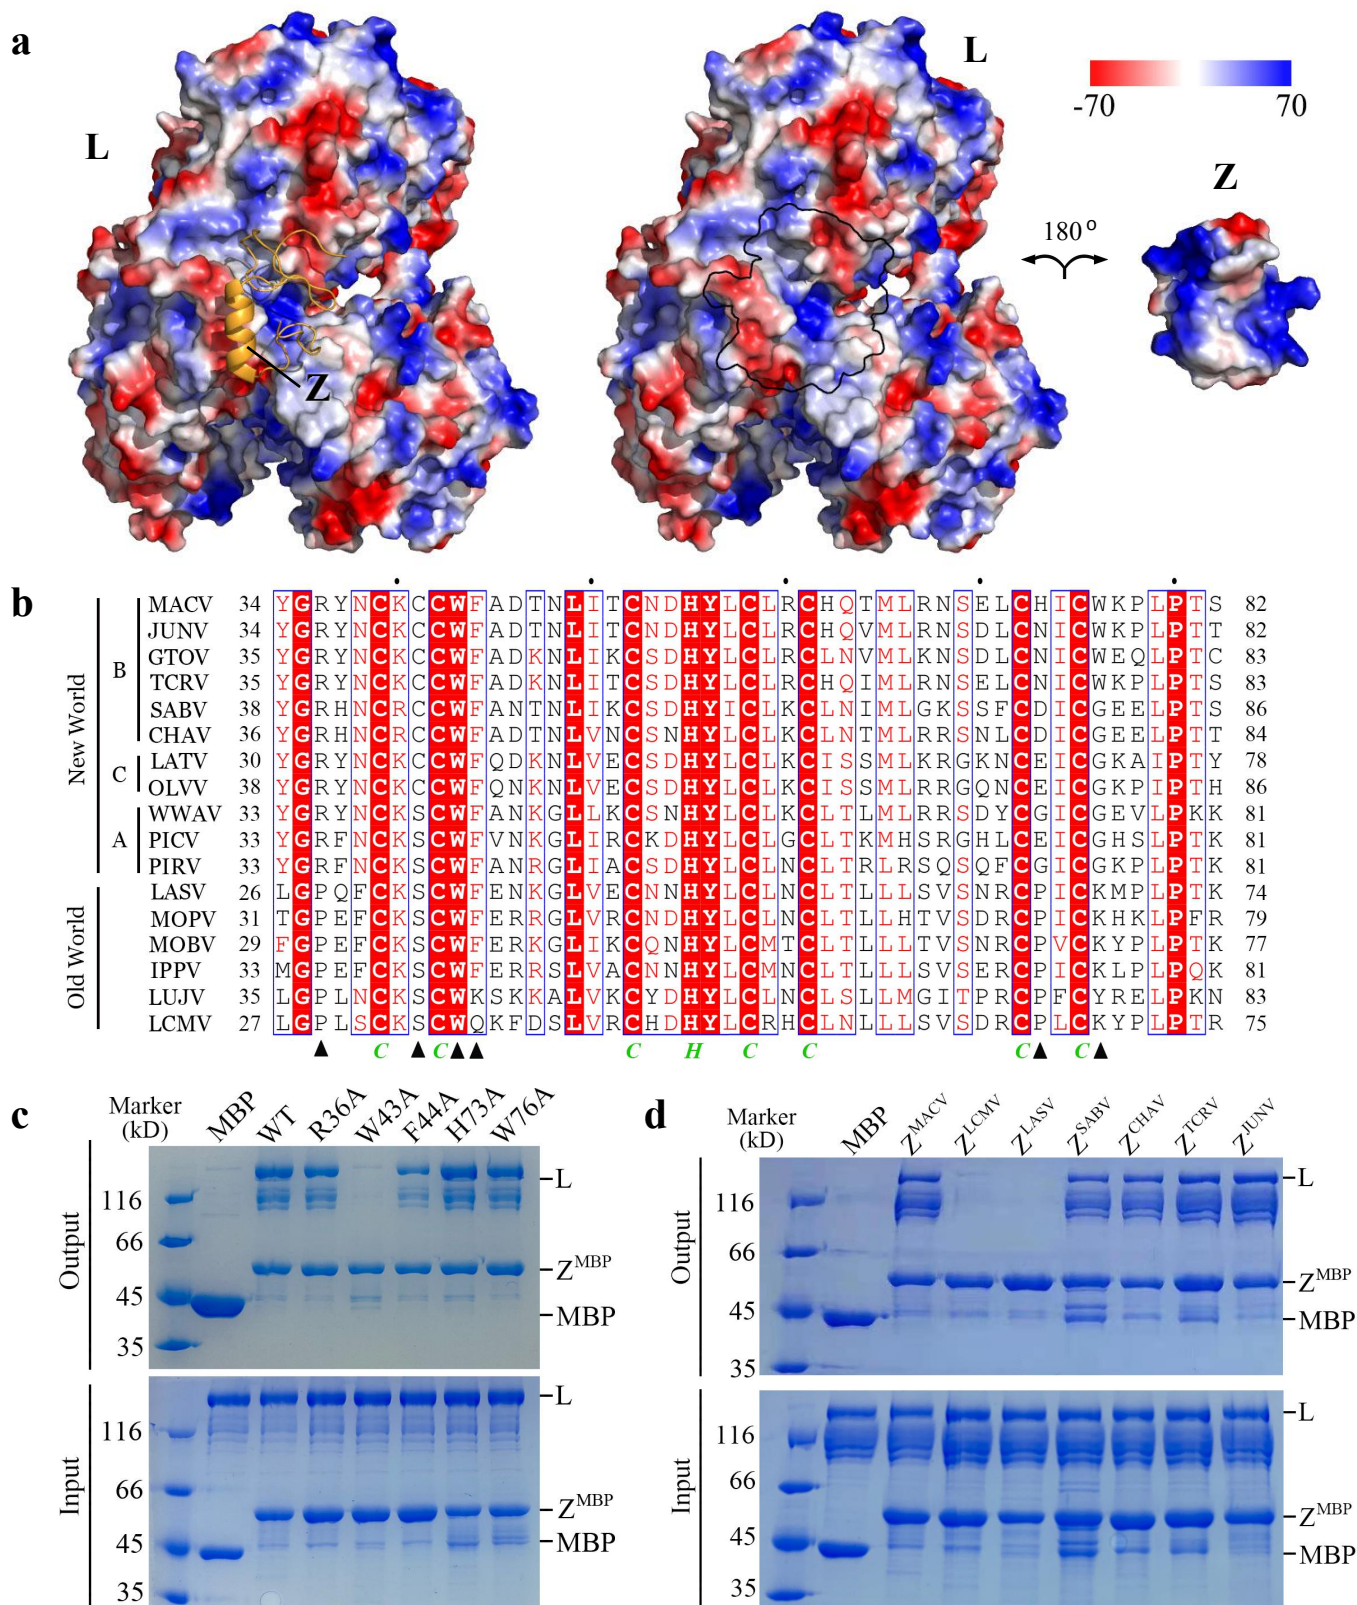

**Supplementary Figure 7. The interaction between the L and Z proteins.** **a** The electrostatic surfaces of the L and Z proteins are shown in an open-book representation. The electrostatic surface is colored blue for positive charges and red for negative charges. The binding interface on L of the Z protein is outlined with a black solid line. **b** Multiple-sequence alignment for RING domain of the Z protein from different arenaviruses. The sequences are classified as Old World and New World arenaviruses marked left. Residues involved in the interaction with L are marked below with black solid triangle, while conserved cysteines and histidine involved in Zn binding are marked below with green italicized C or H. Uniprot accession codes of Z: MACV, Q6IU9; JUNV, Q6IVU5; GTOV, Q6UY71; TCRV, Q88470, SABV, Q6UY62, CHAV, B2C4J2; LATV, A9JR44; OLVV, B0BLK7; WWAV, B2ZDY1; PICV, Q915A4; PIRV, Q6RSS3; LASV, O73557; MOPV, G3LUW9; MOBV, Q27YE6; IPPV, Q27YE2; LCMV, P18541; LUJV, C5ILC3. **c** In vitro pull-down assay of MACV MBP-Z fusion protein mutants involving in the L-Z interaction with the MACV L. **d** In vitro pull-down assay of MBP-Z fusion proteins from different arenaviruses with the MACV L. Experiments in (c) and (d) were repeated independently for more than two times.



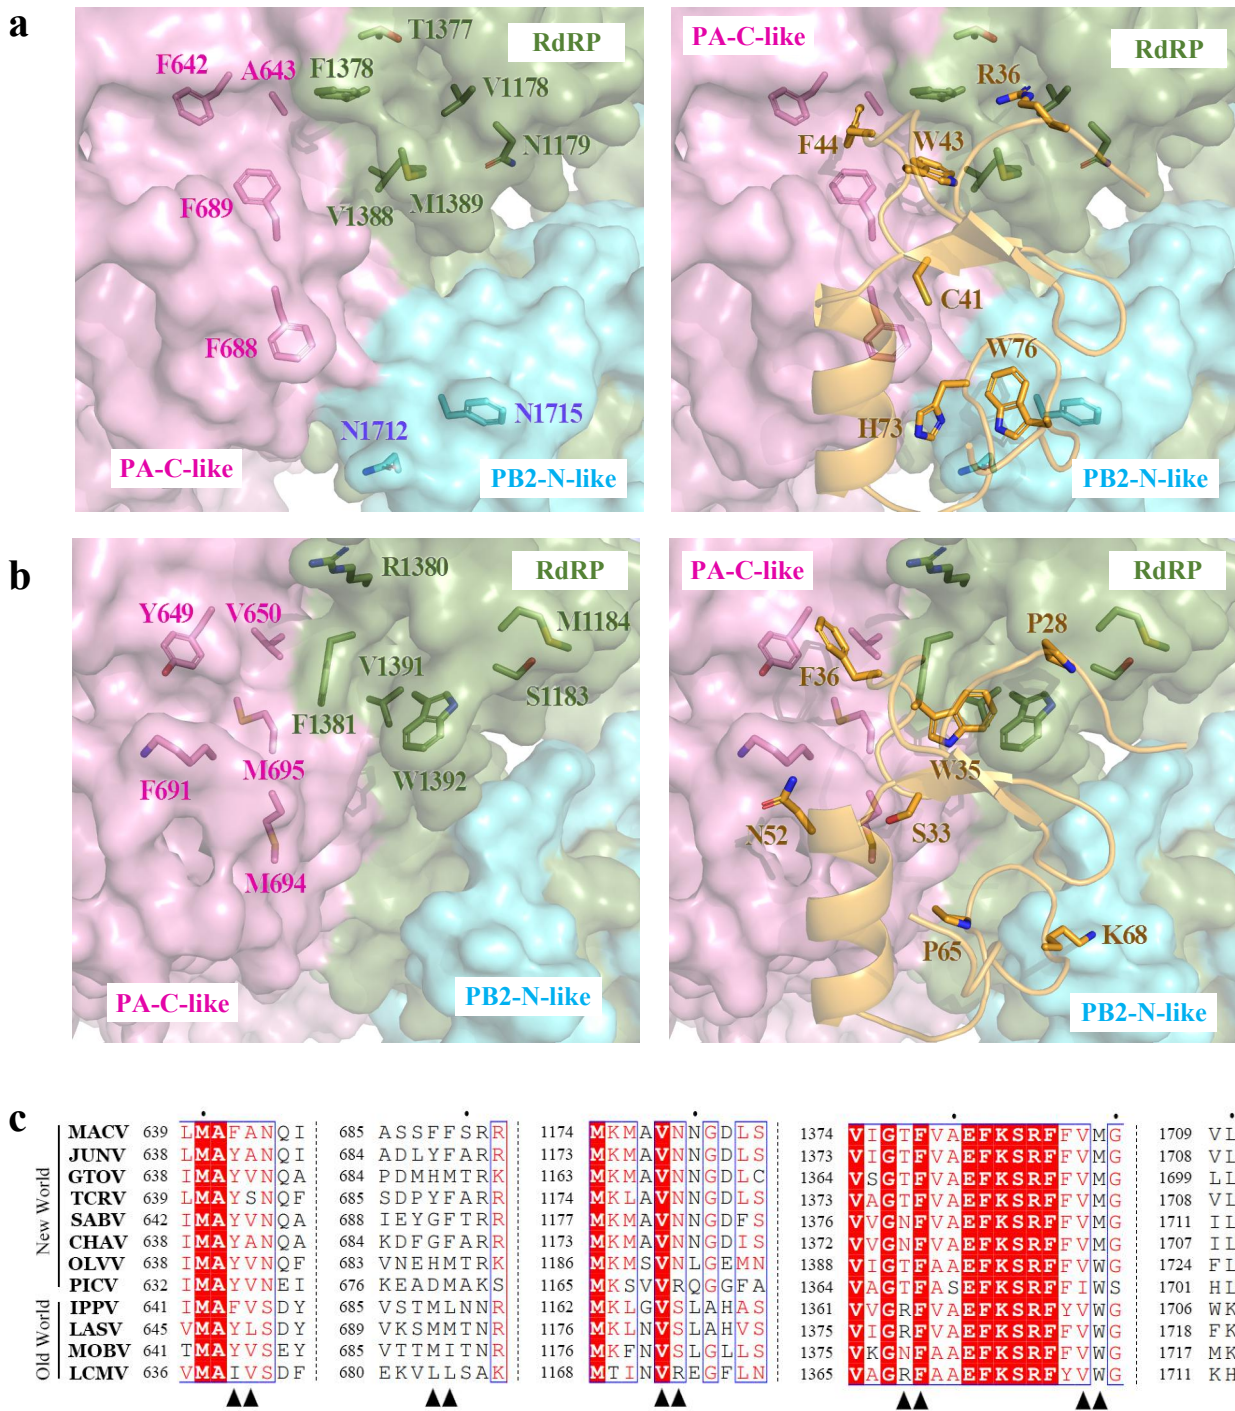

**Supplementary Figure 8. Comparison of binding sites of the L-Z complex between MACV and LASV.**  
**a, b** Binding sites of the L-Z complex. MACV (**a**) and LASV (**b**) L protein (left) are represented as transparent surface. The domains are indicated and colored as in Figure 1a with the side chain of key residues shown as sticks and labeled. MACV and LASV Z protein (right) are in orange ribbons representation with key residues shown as sticks and labeled. The model of the LASV L-Z complex was produced by superposition the cryo-EM structure of LASV L (PDB 6KLC) and the crystal structure of LASV Z (PDB 5I72) with the MASV L-Z complex. **c** Multiple-sequence alignment for L of the regions involved in the interaction with Z. The sequences are classified as Old World and New World arenaviruses marked left. Residues involved in the interaction with Z are marked below with black solid triangle. Uniprot accession codes of L: MACV, Q6IUF8; JUNV, Q6XQI4; GTOV, Q6UY70; TCRV, P20430; SABV, Q6UY61; CHAV, B2C4J3; OLVV, Q6XQH7; PIRV, Q6RSS2; IPPV, Q27YE1; LASV, O09705; MOBV, Q27YE5; LCMV, P14240.

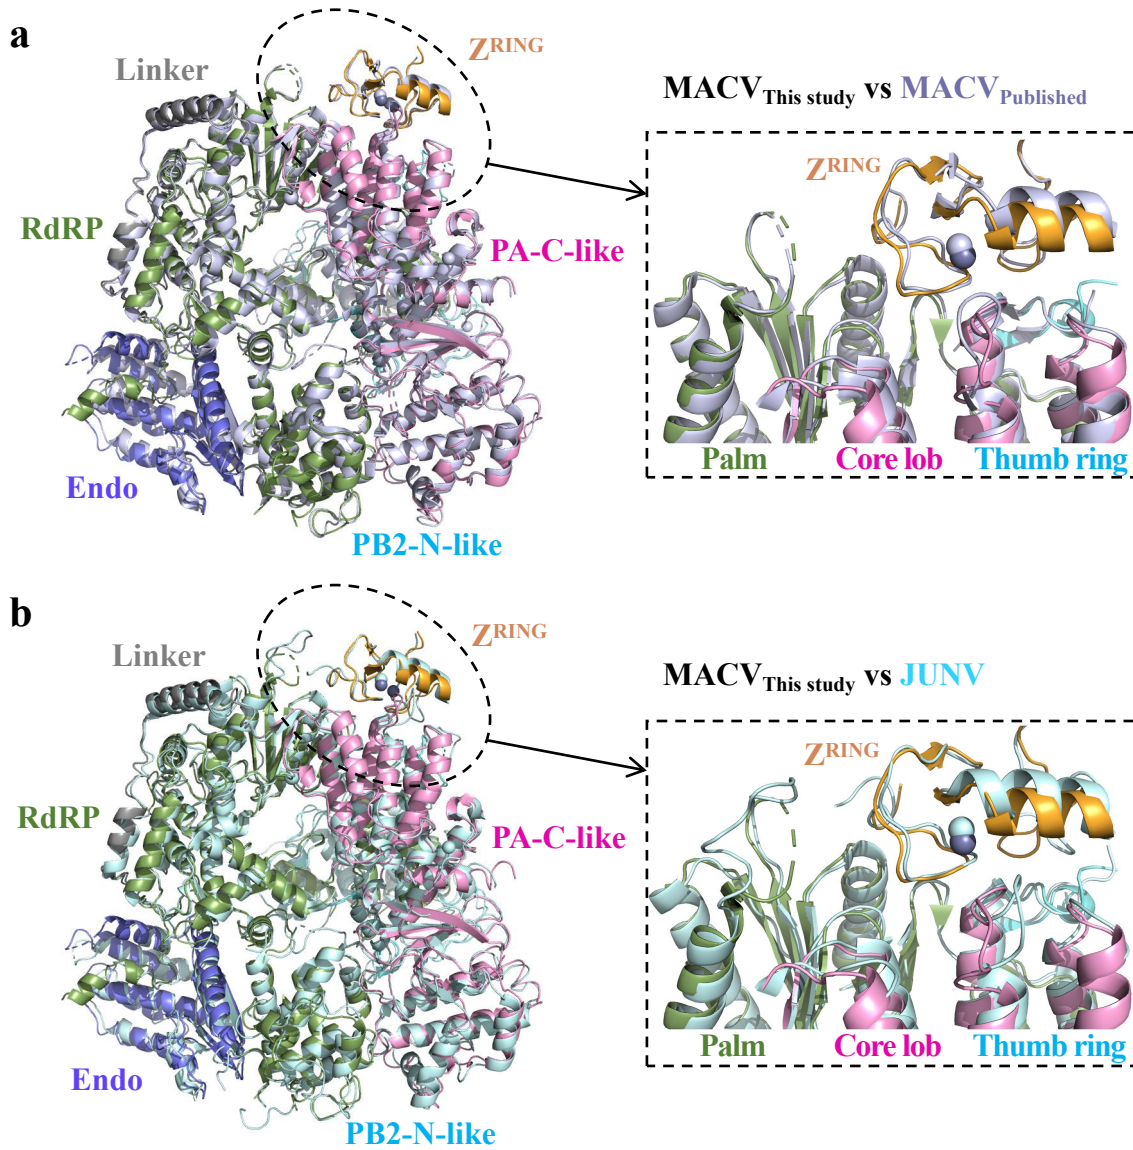

**Supplementary Figure 9. Structural comparison of the MACV L-Z complex in this study with the MACV and JUNV L-Z complexes published.** **a, b** Left, superposition of the overall structure of the MACV L-Z complex in this study with the MACV L-Z complex (PDB 7CKM) (**a**) and the JUNV L-Z complex (PDB 7EJU) (**b**) published. Right, magnified view of the L-Z interfaces indicated by black dashed circles on the left. Domains of the MACV L-Z complex in this study are indicated and colored as in Figure 1a, while the MACV L-Z complex published is colored blue white and the JUNV L-Z complex colored pale cyan.

|                                                     | <b>MACV L-Z complex</b> |              | <b>apo MACV L</b> |              |
|-----------------------------------------------------|-------------------------|--------------|-------------------|--------------|
| Monomer                                             | EMD-31975, 7VGQ         |              | EMD-31985, 7VH3   |              |
| Dimer                                               | EMD-31983, 7VH1         |              | EMD-31984, 7VH2   |              |
| <b>Data collection and processing</b>               |                         |              |                   |              |
| Microscope                                          | FEI Arctica             |              | FEI Titan Krios   |              |
| Detector                                            | Gatan K2 Summit         |              | Gatan K2 Summit   |              |
| Magnification (nominal/calibrated)                  | 130,000                 |              | 105,000           |              |
| Voltage (kV)                                        | 200                     |              | 300               |              |
| Electron exposure (e <sup>-</sup> /Å <sup>2</sup> ) | 60                      |              | 60                |              |
| Defocus rang (µm)                                   | 1.0-3.0                 |              | 0.8-3.0           |              |
| Pixel size (Å)                                      | 0.8                     |              | 0.82              |              |
|                                                     | <b>Monomer</b>          | <b>Dimer</b> | <b>Monomer</b>    | <b>Dimer</b> |
| Symmetry imposed                                    | C1                      | C2           | C1                | C2           |
| Initial particle images (no.)                       | 1,772,578               | 1,015,509    | 1,489,973         | 1,143,890    |
| Final particle images (no.)                         | 492,364                 | 149,686      | 332,322           | 52,947       |
| Map resolution (Å)                                  | 4.0                     | 4.2          | 3.6               | 5.1          |
| FSC threshold                                       | 0.143                   | 0.143        | 0.143             | 0.143        |
| Map resolution range (Å)                            | 3.5-7.5                 | 3.5-7.5      | 3.5-7.5           | 3.5-7.5      |
| <b>Model refinement and validation</b>              |                         |              |                   |              |
| Initial model used (PDB code)                       | 6KLD                    | 6KLH         | 6KLD              | 6KLH         |
| Model resolution (Å)                                | 4.0                     | 4.2          | 3.6               | 5.1          |
| Model resolution range (Å)                          | ∞-4.0                   | ∞-4.2        | ∞-3.6             | ∞-5.1        |
| Map sharpening <i>B</i> factor (Å <sup>2</sup> )    | -230                    | -193         | -180              | -204         |
| Model composition                                   |                         |              |                   |              |
| Non-hydrogen atoms                                  | 13156                   | 13156        | 12749             | 12749        |
| Protein residues                                    | 1661                    | 1661         | 1612              | 1662         |
| Ligands                                             | 2                       | 2            | -                 | -            |
| <i>B</i> factors (Å <sup>2</sup> )                  |                         |              |                   |              |
| Protein                                             | 6.85                    | 89.44        | 27.01             | 208.39       |
| Ligand                                              | 21.89                   | 115.64       | -                 | -            |
| R.m.s. deviations                                   |                         |              |                   |              |
| Bond lengths (Å)                                    | 0.010                   | 0.010        | 0.006             | 0.008        |
| Bond angles (°)                                     | 1.49                    | 1.51         | 1.33              | 1.45         |
| Validation                                          |                         |              |                   |              |
| MolProbity score                                    | 2.04                    | 1.93         | 1.96              | 2.16         |
| Clashscore                                          | 7.14                    | 5.96         | 8.07              | 9.95         |
| Rotamer outliers (%)                                | 0.81                    | 0.74         | 0.90              | 0.76         |
| Ramachandran plot                                   |                         |              |                   |              |
| Favored (%)                                         | 85.94                   | 87.85        | 91.02             | 86.16        |
| Allowed (%)                                         | 13.87                   | 11.91        | 8.53              | 13.72        |
| Disallowed (%)                                      | 0.18                    | 0.25         | 0.44              | 0.13         |

**Supplementary Table 1. Cryo-EM data collection and validation statistics.**

**a The codon-optimized DNA sequence of MACV L gene**

ATGGACGAGTACGTGCAGGAACTGAAGGGCCTGATCCGTAAGCACATCCCTGACCGCTGCGAGTTCGCTCACCAGAAG  
GTCACTTTCTGTCCCAGGTCCACCCTTCCCCCTGCTGACTGAAGGCTTCAAGCTGCTGAGCTCCCTGGTGGAGCTG  
GAAAGCTGCGAGGCCACGCCTGCCAGGCCAACACCGACCAGCGCTTCGTGGACGTCATCCTGTCCGACAACGGTATC  
CTGTGCCCTACTCTGCCTAAGGTCATTCCCGACGGTTTCAAGCTGACCGGCAAGACCCTGATCCTGCTGGAGACTTTC  
GTGCGTGTGAACCCCGACGAATTTGAGAAGAAGTGAAGGCCGACATGTCCAAGCTGCTGAACCTGAAGCACGACCTG  
CAGAAGAGCGGCGTACCCCTGGTCCCATCGTGGACGGCCGTAGCAACTACAACAACCGTTTTCGTGCGGACTGGGTC  
ATCGAACGCATGCGCTGGCTGCTGATCGAAATCCTGAAGGCTTCCAAGTCCATGCTGGAAATCGACATCGAGGACCAG  
GAGTACCAGCGCCTGATCCACTCCCTGTCCAACGTGAAGAACCAGAGCCTGGGCCTGGAGAACCCTGGAGCACCTGAAG  
CGCAACTCCCTGGACTACGACGAACGTCTGAACGAAAGCCTGTTTCATCGGCCTGAAGGGCGACATCCGCGAATCCACT  
GTCCGTGAGGAGCTGATCAAGCTGAAGATGTGGTTCAAGGACGAAGTGTTCCTCCAAGGGCCTGGGCAAGTTCAAGCTG  
ACTGACCGCGGTGAGCTGCTGGAGTCCCTGTCCCTCCCTGGGCGCTCACCTGGACTCCGACGTCCTCCTGCCCTTC  
TGCAACAACAAGCTGATGGAGATCGTCTACAACGTGACCTTCTCCAGCGTGGAGCGCACTGACGGTGTGCCACCGTC  
GACCAGCAGTTCTCCACCCTCACACTAACATCGAGAAGCACTACCTGTCCGTCCCTGAGCCTGTGCAACAAGATCAAG  
GGCCTGAAGGTCTTCAACACCCGCCGCAACACCCTGCTGTTCCCTGGACCTGATCATGGTCAACCTGATGGTGCACATC  
TCCGAGTCCCTGCCAGGACGCTATCGAGTCCCTGCGTAAGTCCGGTCTGATCGTCCGTCAGATGGTCAATGCTGGTGAAC  
GACCGCGTGTGGACATCCTGGAGGCTATCAAGCTGATCCGTAAAAAGATCGGTACTAACCCTCAACTGGGTCAAGAAC  
TGCTCCAAGATCCTGGAGCGCAGCCACCCTGAGATCTGGCTGCAGCTGAACACCCTGATCCGCCAGCCTGACTTCAAC  
AGCCTGATCTCCATCGCTCAGTACCTGGTGAAGGACCGTCCCATCATGCGTTACAGCGTCGAGCGTGGTTCCGACAAG  
ATCTGCCGTACAAGCTGTTCCAGGAGATGTCCCTCCTTCGAGCAGATGCGCCTGTTCAAGACTCTGAGCTCCATCAGC  
CTGTCCCTGATCAACTCCATGAAGACTAGCTTCTCCTCCCGTCTGCTGGTGAACGAGCGCAATTTTCTAAGTACTTC  
GGCAACGTGCGTCTGCGTGAAGTGTACGCTCAGCGCTTCTACCTGGCTGAGAGCCTGGTCCGCTTCTGTTTCTACCAG  
AAGACCGGCGAACGCTCCCGCTGCTACAGCGTCTACCTGTCCGACAATGGTGTGATGAGCGAGCAGGGTTCCTTCTAC  
TGCGACCCTAAGCGCTTCTTCCCTGCCTGTGTTCTCCGACGAAGTGTGGCCGGTATGTGCGAAGAGATGACCAGCTGG  
CTGGACTTCGACACCGGTCTGATGAACGACACTGGTCCATCCTGCGCCTGCTGGTGTGGCCATCCTGTGCTCCCCT  
AGCAAGCGTAACCAGACCTTCCCTGCAGGGTCTGCGTTACTTCCCTGATGGCTTTTCGTAACCAGATCCACCACATCGAC  
CTGATCTCCAAGCTGGTTCGTGGAATGCAAGTCCAGCAGCGAGGTTCGTGGTCCAGCGCCTGGCTGTGGGTCTGTTTCATC  
CGTCTGCTGGGCGGTGAGAGCGACGCCAGCAGCTTCTTCTCCCGTTCGTTTCAAGTACCTGCTGAACGTCAGCTACCTG  
TGCCACCTGATCACCAAGGAGACCCCTGACCGTCTGACTGACCAGATCAAGTGTTCGAAAAGTTTCATCGAACCCAAG  
GTCAAGTTCCGTTGCGCTGTGCTCAACCTTCCCTGAACGGCAAGCTGACTGTGCGACCAGGAAGACATCATGATCAAC  
GGTCTGAAGAAGTTCCTTTCAGCAAGAGCCTGCGTGACACCGAGGACGTCCAGACTCCTGGCGTGTGCAAGGAACCTGCTG  
AACTACTGCGTCTCCCTGTTCAACCGCGGCAAGCTGAAGGTGTCCGGTGAAGTGAAGAACAACCCCTTCCGCCCAAC  
ATCACTAGCACCGCCCTGGACCTGAGCAGCAACAAGAGCGTTCGTTCATCCCAAGCTGGACGAGCTGGGTAACATCCTG  
AGCACTTACGACAAGGAAAAGCTGGTGAAGCGCCTGCGTGTCCAGCATGGCCGAACGCTTCAAGACTAAGGGTTCGTTAC  
AACCTGGACCCCGAAAGCACCAGCTACCTGATCCTGAAGAACCTGACTGGTCTGGTCTCCGCTGGCCCAAGGCTAAG  
TCCCTCCAGGAGGAACTGAGCCTGATGTACGAGACTCTGACTGAGGAGCAGGTGGAGAGCTTCAACGAGATCAAGTAC  
GACGTGCAGGTGCTCTGGCTAAGATGGCTGACAACCTCCGTCAACACCCGATCAAGAACCTGGGTCGCGCCGACAAC  
TCCGTGAAGAACGGCAACAACCCCTGGACAACCTGTGGAGCCCTTCGGCGTGTGATGAAGGAAATCCGTGCCGAGGTG  
AGCCTGCACGAAGTCAAGGACTTCGACCCCGACGTCCTGCCTAGCGACGTCCTACAAGGAACTGTGCGACGCTGTGTAC  
AAGAGCAGCGAGAAGTGAACCTTCTTCCCTGGAGGAAGTGTGGACGTCGCCCCCTGGGTCTGCTGCTGAAGAACCTC  
ACTACCTCCAGCTACATGGAAGAAGAGTACTTCATGTGCTTCAAGTACCTCCTGATCCAGGGCCACTTCGACCAGAAG  
CTGGGTTCCTACGAACACAAGAGCCGCTCCCGTCTGGGCTTCACTGACGAGACTCTGCGTCTGAAGGACGAGGTCCGT  
CTGAGCATCCGTGAGTCCAACAGCGAAGCTATCGCCGACAAGCTGGACAAGTCTACTTCAACCAACGCTGCCCTGCGT  
AACCTGTGCTTCTACTCCGAAGACAGCCCCACTGAGTTCACCAGCATCAGCTCCAACAGCGGTAACCTGAAGTTCGGT  
CTGTCTTACAAGGAGCAGGTGGGCTCCAACCGCGAGCTGTACGTGGGTGACCTGAACACCAAGCTGATGACCCGCCCTG  
GTGGAGGACTTCAGCGAGGCCGTGGGTAACCTCCATGAAATACACTTGCCTGAACTCCGAAAAGGAGTTCGAGCGTGT  
ATCTGCGACATGAAGATGGCCGTCAACAACGGTGACCTGTCCCTGCAGCTACGACCCTCCAAGTGGGGTCCCACCATG  
TCCCCTGCCCTGTTCCCTGGCTCTGCTGCAGATGCTGGAGCTGCGTACTCCTGTGGACCAGCAAGATCGACCTGGAC  
TCCGTCAAGTCCATCCTGAAGTGGCACCTGCACAAGGTGGTGGAGGTCCCCATCAACGTCGCCGAAGCCTACTGCATC  
GGTAAACTGAAGCGCAGCCTGGGCCTCATGGGCTGCGGCTCTACTAGCCTGAGCGAGGAATTTTTCCACCAGACTATG  
CAGCTGTCCGGCCAGATCCCCCTCCACATCATGTCCGTCTGGACATGGGTGAGGGTATCCTGCACAACACCTCCGAC  
CTGTACGGCCTGATCACCGAGCAGTTCCCTGTGCTACGCCCTGGACCTCCTGTACGACGTCATCCCCGTGAGCTACACC  
TCCAGCGACGACCAGATCACCTGGTGAAGACTCCCTCCCTGGACATCGAAGGTGGTTCCGACGCCGCCGAGTGGCTG  
GAGATGATCTGCTTCCACGAGTTCCTGTCCAGCAAGCTGAACAAGTTCGTCTCCCCAAGAGCGTGTGCGTACTTTC  
GTCGCTGAGTTTAAAAGCCGCTTCTTTCGTGATGGGCGAAGAAACCCCTCTGCTGACTAAGTTCGTGTCCGCCGCTCTG  
CACAACGTGAAGTGAAGACTCCCACTCAGCTGTCCGAAACTATCGACACCATCTGCGACCAGTGCATCGCCAACGGC  
GTGTCCACTAAGATCGTGGCTCGTATCTCCAAGCGCGTGAACCAGCTGATCCGCTACAGCGGTTACGGCGACACTCCT  
TTCGGCGCTATCGAAGACCAGGACGTGAAGGACTGGGTGGACGGCAGCCGTGGCTACCGTCTGCAGCGCAAGATCGAG  
GCTATCTTCTACGACGACAAGGAGACTTCCCTTCATCCGTAACTGCGCCCGTAAGGTCTTCAATGACATCAAGCGCGGC  
CGCATCTTTCGAAGAGAACCCTGATCAACCTGATCGGCCGTGGTGGTGACGAGGCCCTGACCGGTTTCTGCAGTACGCC



GGTTGCAGCGAACAGGAGGTCAACCGCGTGCTGAACTACCGCTGGGTGAACCTGAGCAGCTTCGGTGACCTGCGCCTG  
GTCCTGCGCACCAAGCTGATGACTTCCCGCCGTGTGCTGGAGCGTGAGGAAGTGCCACTCTGATCAAGACCCTGCAG  
AGCAAGCTGTCCCGCAACTTCACCAAGGGCGTGAAGAAGATCCTGGCTGAGTCTATCAACAAGTCCGCCTTCCAGTCC  
AGCGTGGCTTCCGGTTTCATCGGTTTCTGCAAGAGCATGGGTTCGAAGTGCCTGCGTGACGGTAAAGGTGGCTTCCTG  
TACATCAAGGAGGTGTACTCCGGTATCAACGTCTGCATCTGCGAAATCTGCGCCCTGAAGCCTAAGATCATCTACTGC  
AACGACTCCCTGAACAAGGTGAGCCAGTTCAGCAAGCCTATCCTGTGGGACTACTTCTCCCTGGTGCTGACCAACGCT  
TGCGAGCTGGGCGAGTGGGTCTTCTCCACCGTGAAGGAGCCTCAGAAGCCTCTGGTGCTGAACAACCAGAACTTCTTC  
TGGGCTGTGAAGCCTAAGGTGGTGCCTCAGATCGAAGACCAACTGGGCATGAACCACGTGCTGCAGTCCATCCGCCGC  
AACTACCCTGTGCTGTTTCGACGAACACCTGGCTCCCTTCATGAACGACCTGCAGGTGAGCCGTACTATGGATAGCGGC  
CGTCTGAAGTTCCTGGACGTGTGCATCGCTCTGGACATGATGAACGAAAACCTGGGTATCATCAGCCACCTGCTGAAG  
ACTCGTGACAACCTCCGTTTACATCGTGAAGCAGTCCGACTGCGCTCTGGCCACATCCGCCAGTCTCCTACTACTGAC  
TGGGAGCTGGGTCTGAGCCCTCAGCAGATCTGCACCAACTTCAAGACCCAGCTGGTGCTGAGCAGCATGGTGAACCC  
CTGGTGCTGTCTACTTCCCTGCCTGAAGAGCTTCTTCTGGTTC AACGAAGTCTGGAACCTGGAGGACGACTCCAGATC  
GAACTGGCCGAACTGACTGACTTCGCTCTGATGGTCAAGAACCAGAAGCTCTCCCGTGCCATGTTTCGTCGAGGACATC  
GCTATGGGTTACGTCGTGAGCAACTTCGAAGGTGTGCGCATCTCCCTGAGCAACGTGATGGTGGACGGTGTCCAGCTG  
CCCCCAAGGAAAAGGCTCCTGACGTGGGCGTCTGTTCGGTCTGAAGGCTGAAAACGTGATCGTGGGCTGGTGTCTC  
CAGATCGACCAGTCCGCATGAGCACTAAGTTCGAAGCTCCGCCGTAAGATGGTCTACAGCTTACAGCCTGGAGTGCCT  
ATGGACGTTCGGTGACATCCAGAACAAGGAGGTCAATTCTGAAGGTGGTGGCCGTCGACCAGTCCGTCAGCGGTTCCGGT  
GGCAACCACATGCTGCTGGACGGTGTGCCGTGTTCATCGCTTCCCTGCCTCTGTTTCACCGGCCAGGCTAGCTTCGACCTG  
GCCGCTATGCTGATCGAGAGCAACCTGGCCGGCAGCAACGACAACCTTCCCTGATGAGCAACGTCCTCTGGACCTGGGC  
GGCTTCTCCCCGAGCTGAGCGACAAGTACTCCTACCGTCTGTCCGGCCCCGAAAACAGGAAGACCCTCTGGTCTCTG  
AAGGACGGCGCCTTCTACGTGGGTGGCGAACGTCTGTCCACCTACAAGGTGAGCTGACCGGTGACCTGGTGGTCAAG  
GCCCTGGGTGCCCTGGAGGACGATGAGGGCGTCTGTGAGCATGCTGCACCAGCTGTGGCCTTACCTGAAGGCCACTAGC  
CAGGTCAATTCTGTTCCAGCAGGAGGACTTCACCATCGTCCACGACCTGTACAAGATCCAGCTGACCAAGTCCATCGAG  
TCCTTCGGTGAGTGGATCGAGTTCACCTAAGTTCGAAGGTGGCTTACTCCAAGTCCCTGAAGGAGCTGGTCACTCTCCGAC  
ACTCAGGGTAGCTTCCGCCTGAAGGGCGTCAATGTGCCGCCCTGGCTAACACTCTGCAGGTGGAAGACATCGAGTGG  
TCCCACCCTCAGTTCGAAAAGGGCGGCGGTAGCGGCGGTGGCTCCGGTGGTTCGAAGCGCTTGGAGCCACCCCCAGTTC  
GAAAATAA

#### **b The codon-optimized DNA sequence of MACV Z gene**

ATGGGCAACTGCAACAAGCCCCCAAGCGCCCTCCCAACACCCAGACTTCCGCTGCCAGCCTTCCGCCGAGTTCGGT  
CGTACCGCTCTGCCCTCCCTGTACGGCCGTTACAACCTGCAAGTGTGCTGGTTTCGCTGACACCAACCTGATCACTTGC  
AACGACCACTACCTGTGCCTGCGCTGCCACCAGACTATGCTGCGTAACAGCGAACTGTGCCACATCTGCTGGAAGCCC  
CTGCCCACTTCCATCACTGTCCCCGTGGAGCCCTCCGCTCCTCCCCCTTAA

#### **c The codon-optimized DNA sequence of LASV Z gene**

ATGGGCAATAAACAGGCCAAAGCACCGGAAAGTAAAGATAGCCCGCGTGCCAGCCTGATTCCGGATGCCACCCATCTG  
GGCCCGCAGTTTTGCAAAAAGTTGTTGGTTTTGAAAATAAGGGTCTGGTTGAATGTAATAATCATTATCTGTGTCTGAAC  
TGCCCTGACCCTGCTGCTGAGCGTTAGTAATCGCTGCCCGATTTGTAAAATGCCGCTGCCGACCAAACTGCGTCCGAGC  
GCCGCCCTACCGCACCTCCTACAGGTGCCGCCGATAGCATTGCCCGCCGCTTATAGTCCGTAA

#### **d The codon-optimized DNA sequence of LCMV Z gene**

ATGGGTCAGGGTAAAAGTCTGTAAGAAAAAGGTACAAATAGTACCAATCGTGCCGAAATTCCTGCCGGATACCACCTAT  
CTGGGCCCGCTGAGCTGTAAAAGCTGCTGGCAGAAAATTTGATAGTCTGGTGCCTTGCCATGATCATTATCTGTGTCTGC  
CATTGTCTGAATCTGCTGCTGAGCGTTAGCGATCGTTGCCCGCTGTGTAATAATCCGCTGCCGACCCGCTGAAAATT  
AGCACCGCCCCGAGTAGTCCGCCGCCGTATGAAGAATAA

#### **e The codon-optimized DNA sequence of JUNV Z gene**

ATGGGCAATTGTAATGGTGCAAGTAAAAGCAATCAGCCGGATAGCAGCCGCGTTACCCAGCCGGCCGCGCAATTCGT  
CGCGTTGCACATAGCAGTCTGTATGGTTCGCTATAATTTGTAATGTTGCTGGTTTTGCCGATACCAATCTGATTACCTGT  
AATGATCATTATCTGTGTCTGCGTTGTATCAGGTTATGCTGCGTAATAGCGATCTGTGCAATATTTGCTGGAAACCG  
CTGCCGACCACCATACCGTGCCGGTGGAAACCGACCGCCCCGCCTCCTTAA

**f The codon-optimized DNA sequence of SABV Z gene**

```
ATGGGTAATAGCAAAAGCAAAAGTAAGCTGAGCGCAAATCAGTATGAACAGCAGACCGTTAATAGTACCAAACAGGTG
GCAATTCTGAAACGCCAGGCAGAACCGAGCCTGTATGGTCGCCATAATTGTCGTTGTTGCTGGTTTGCAAATACCAAT
CTGATTAAGTGTAGTGATCATTATATCTGTCTGAAATGCCTGAATATTATGCTGGGTAAAAGCAGCTTTTGTGATATT
TGCGGCGAAGAAGCTGCCGACCAGTATTGTTGTTCCGATTGAACCGAGTGCCCCGCCGCCGAAGATTAA
```

**g The codon-optimized DNA sequence of CHAV Z gene**

```
ATGGGCAATACCAAACCAAAGATCGCCAGTATCAGAGCAATAGTAGCCAGCCGACCAATACCAGCGCCCCGGTTCTG
CTGCGTCGCCAGGCTGAACCGAGCCTGTATGGTCGTCATAATTGCCGTTGTTGCTGGTTTGCAGATACCAATCTGGTT
AATTGTAGTAATCATTACCTGTGTCTGAAATGTCTGAATACCATGCTGCGTCGCAGTAATCTGTGTGATATTTGCGGC
GAAGAAGTGCCGACCACCATTATTGTGCCGGTTGAACCGAGTGCCCCGCTGCCGGGTCAGTAA
```

**h The codon-optimized DNA sequence of TCRV Z gene**

```
ATGGGTAATTGTAACCGTACCCAGAAAACCGAGCAGCAGCAATAATCTGGAAAAACCGCCGCAGGCCGCCGAATTT
CGCCGCACAGCCGAACCGAGCCTGTATGGTCGTTATAATTGTAATGCTGTTGGTTTGCAGATAAAAATCTGATTACC
TGTAGTGATCATTACCTGTGTCTGCGCTGCCATCAGATTATGCTGCGCAATAGTGAAGTGTGCAATATTTGTTGGAAA
CCGCTGCCGACCAGTATTCGTGTTCCGCTGGAAGCAAGTGCCCCGGATCTGTAA
```

**Supplementary Table 2. The codon-optimized DNA sequences of L and Z genes. MACV L (a); MACV Z (b); LASV Z (c); LCMV Z (d); JUNV Z (e); SABV Z (f); CHAV Z (g); TCRV Z (h).**



| <b>Primers</b> | <b>Sequence</b>           |
|----------------|---------------------------|
| 3' vRNA        | 5'-GCGUGUCACCUAGGAUCCG-3' |
| 5' vRNA        | 5'-CGCACCGGGGAUCCUAGGC-3' |

**Supplementary Table 3. The vRNA primers for *in vitro* polymerase activity assays.**
